# Supplementary material for: Senescence-associated reprogramming induced by interleukin-1 impairs response to EGFR neutralization
Source: Springer Nature journal article supplement (doi:10.1186/s11658-022-00319-7), 2022-03-02

**a**

## Caco-2 CXR

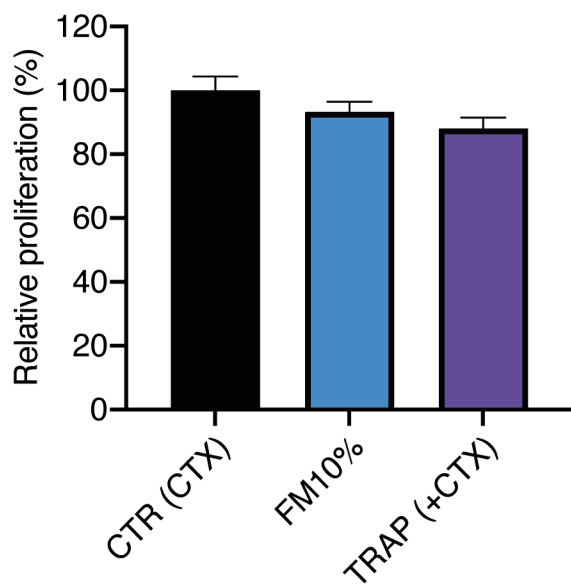**b**

## Caco-2 CXR

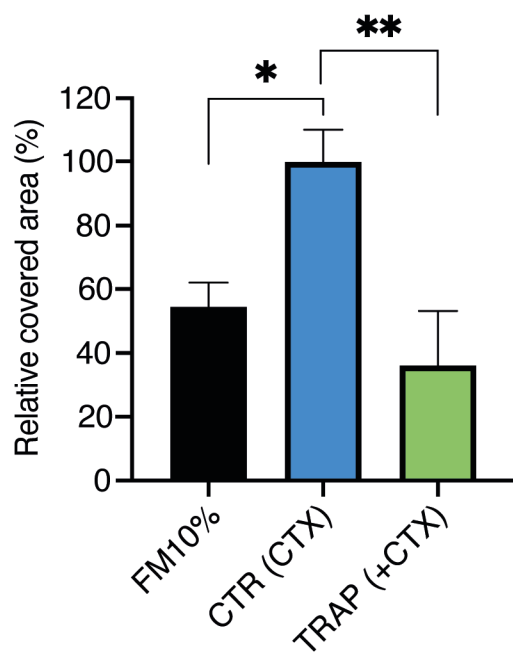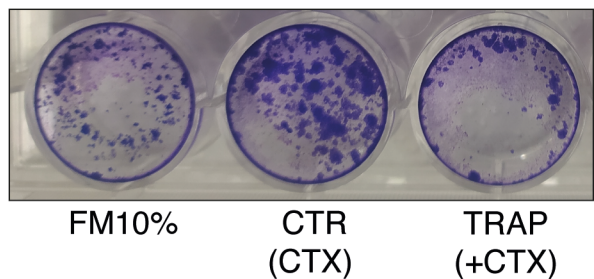**c**

## Caco-2 P

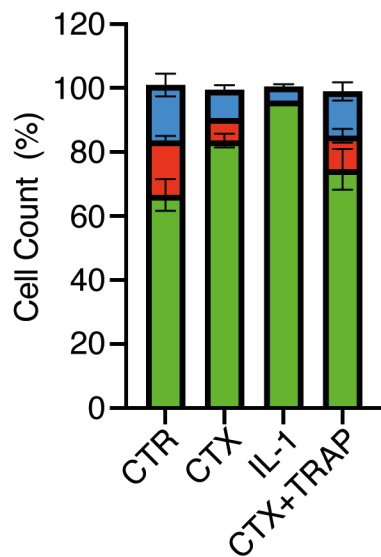**d**

## Caco-2 CXR

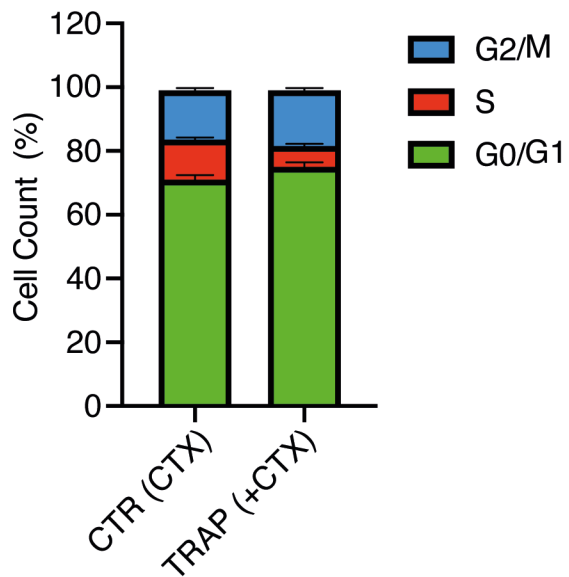

Supplement: MOESM1 [file 11658_2022_319_MOESM1_ESM.pdf]
