# Supplementary material for: Senescence-associated reprogramming induced by interleukin-1 impairs response to EGFR neutralization
Source: Springer Nature journal article supplement (doi:10.1186/s11658-022-00319-7), 2022-03-02

FIG.3A

EGFR

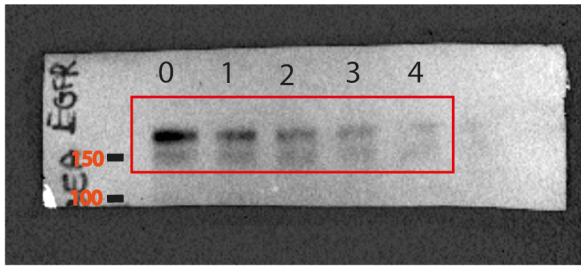

HP1 $\gamma$

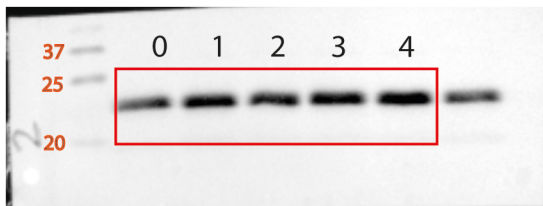

GAPDH

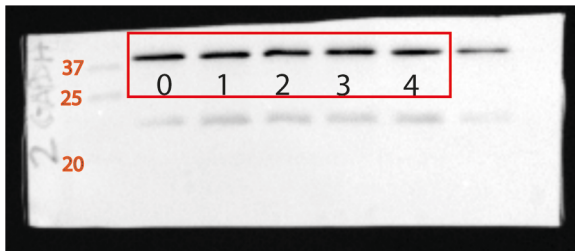

FIG.3B

IL1R1

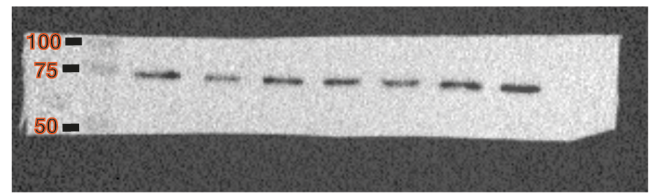

GAPDH

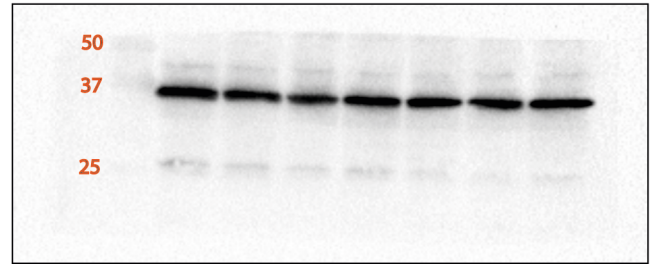

SNAI1

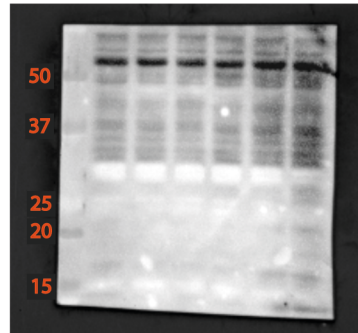

GAPDH

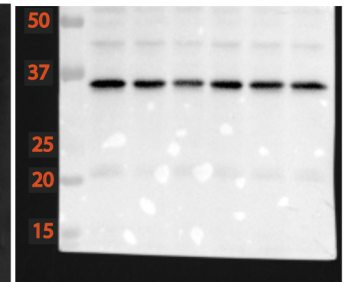

Supplement: MOESM3 [file 11658_2022_319_MOESM3_ESM.pdf]
